# Supplementary material
Source: PubMed Central journal article supplement (PMC5885892)
Supplement: jamacardiol-3-247-s001.pdf [file jamacardiol-3-247-s001.pdf]

## Supplementary Online Content

Silverberg O, Park AL, Cohen E, Fell DB, Ray JG. Premature cardiac disease and death in women whose infant was preterm and small for gestational age: a retrospective cohort study. *JAMA Cardiol*. Published online January 31, 2018. doi:10.1001/jamacardio.2017.5206

### **eTable. Variables Used to Define Cohort Entry/Exclusion Criteria and Study Exposure, Outcome, and Adjustment Variables**

This supplementary material has been provided by the authors to give readers additional information about their work.

**eTable. Variables Used to Define Cohort Entry/Exclusion Criteria and Study Exposure, Outcome, and Adjustment Variables**

| <b>Assessment</b>                       | <b>Timing</b>                                                                            | <b>Disease or procedure</b>                                                                                                        | <b>ICD-9 [ICD-10-CA] codes</b>                                            | <b>OHIP ICD-9 codes {or other source if in parentheses}</b> | <b>PubMed link to a related validation study of some codes</b> |
|-----------------------------------------|------------------------------------------------------------------------------------------|------------------------------------------------------------------------------------------------------------------------------------|---------------------------------------------------------------------------|-------------------------------------------------------------|----------------------------------------------------------------|
| <b><i>Cohort entry criterion</i></b>    | April 1, 2002 to March 31, 2015                                                          | Any nulliparous woman with a singleton livebirth in hospital at $\geq$ 23 weeks' gestation                                         | Main patient service code indicating "obstetrical delivery" (in MOMBABY). |                                                             |                                                                |
| <b><i>Cohort exclusion criteria</i></b> | $\leq$ 24 months prior to, and including, the first index obstetrical delivery admission | Cardiac dysrhythmia                                                                                                                | 427.3 [I48], 427.1 [I47.2], 427.4 [I49.0], 427.2 [I47.2]                  | 427                                                         |                                                                |
|                                         | Same                                                                                     | Heart failure                                                                                                                      | 428 [I50]                                                                 | 428                                                         |                                                                |
|                                         | Same                                                                                     | Pericardial, endocardial or myocardial disease, cardiomyopathy or peripartum cardiomyopathy or rheumatic or valvular heart disease | 420-425 [I30-I43], 674.5 [O90.3], 390-392 [I00-I02, I05-I09]              | 398                                                         |                                                                |

| <b>Assessment</b>          | <b>Timing</b>                                                                                      | <b>Disease or procedure</b>                                                                                                                                       | <b>ICD-9 [ICD-10-CA] codes</b>                                                                                                                               | <b>OHIP ICD-9 codes {or other source if in parentheses}</b> | <b>PubMed link to a related validation study of some codes</b>                                          |
|----------------------------|----------------------------------------------------------------------------------------------------|-------------------------------------------------------------------------------------------------------------------------------------------------------------------|--------------------------------------------------------------------------------------------------------------------------------------------------------------|-------------------------------------------------------------|---------------------------------------------------------------------------------------------------------|
|                            | Same                                                                                               | Congenital heart disease                                                                                                                                          | 745-746, 7470, 7471, 7472, 7473, 7474 [Q20-Q26]                                                                                                              | 745-747                                                     |                                                                                                         |
|                            | Same                                                                                               | Coronary artery disease                                                                                                                                           | 410, 411, 413, 414.0, 429.2, 48* [I20, I21, I24, I25.0, I25.1, I51.3, 1HZ80*, 1IJ50*, 1IJ55*, 1IJ57*, 1IJ76* 1IJ80*, 1IK80*, 1IK87*, 1IL35*, 2IL70*, 3IP10*] | 410, 412, 413, 429                                          |                                                                                                         |
| <b>Main study exposure</b> | At birth                                                                                           | Preterm birth at 23 to 36 weeks' gestation                                                                                                                        | MOMBABY dataset                                                                                                                                              |                                                             | <a href="https://www.ncbi.nlm.nih.gov/pubmed/21733347">https://www.ncbi.nlm.nih.gov/pubmed/21733347</a> |
|                            | Same                                                                                               | Severe SGA birthweight < 5th percentile for sex and gestational age                                                                                               | MOMBABY dataset                                                                                                                                              |                                                             |                                                                                                         |
| <b>Study outcomes</b>      | Starting at 30 days after the index birth date (May 1, 2002 to March 31, 2016) = "t <sub>0</sub> " | Maternal cardiac arrhythmia <ul style="list-style-type: none"> <li>• Atrial fibrillation or flutter</li> <li>• Ventricular tachycardia or fibrillation</li> </ul> | <ul style="list-style-type: none"> <li>• 427.3 [I48.0, I48.1]</li> <li>• 427.1 [I47.2], 427.4 [I49.0], 427.2 [I47.9]</li> </ul>                              |                                                             | <a href="https://www.ncbi.nlm.nih.gov/pubmed/12177647">https://www.ncbi.nlm.nih.gov/pubmed/12177647</a> |

| Assessment        | Timing                                                             | Disease or procedure             | ICD-9 [ICD-10-CA] codes                                                                                                                                      | OHIP ICD-9 codes {or other source if in parentheses} | PubMed link to a related validation study of some codes                                                 |
|-------------------|--------------------------------------------------------------------|----------------------------------|--------------------------------------------------------------------------------------------------------------------------------------------------------------|------------------------------------------------------|---------------------------------------------------------------------------------------------------------|
|                   | Same                                                               | Maternal heart failure           | 428 [I50]                                                                                                                                                    |                                                      | <a href="https://www.ncbi.nlm.nih.gov/pubmed/12177647">https://www.ncbi.nlm.nih.gov/pubmed/12177647</a> |
|                   | Same                                                               | Maternal coronary artery disease | 410, 411, 413, 414.0, 429.2, 48* [I20, I21, I24, I25.0, I25.1, I51.3, 1HZ80*, 1IJ50*, 1IJ55*, 1IJ57*, 1IJ76* 1IJ80*, 1IK80*, 1IK87*, 1IL35*, 2IL70*, 3IP10*] |                                                      | <a href="https://www.ncbi.nlm.nih.gov/pubmed/21979370">https://www.ncbi.nlm.nih.gov/pubmed/21979370</a> |
|                   | Same                                                               | Maternal death                   | {Registered Persons Database, which contains demographic information and encrypted healthcare numbers for all individuals eligible for OHIP}                 |                                                      |                                                                                                         |
| <b>Covariates</b> | ≤ 24 months before the index birth date or time-varying thereafter | Diabetes mellitus                | 250, 648.8 [E10, E11, E13, E14, O244]                                                                                                                        | 250                                                  | <a href="https://www.ncbi.nlm.nih.gov/pubmed/11874939">https://www.ncbi.nlm.nih.gov/pubmed/11874939</a> |
|                   | Same                                                               | Chronic hypertension             | 401, 405, 642.0-642.2, 642.7 [I10, I15, O10, O11]                                                                                                            | 401                                                  | <a href="https://www.ncbi.nlm.nih.gov/pubmed/19858407">https://www.ncbi.nlm.nih.gov/pubmed/19858407</a> |
|                   | Same                                                               | Obesity                          | 278.0 [E66]                                                                                                                                                  | 278                                                  |                                                                                                         |

| <b>Assessment</b> | <b>Timing</b>      | <b>Disease or procedure</b>         | <b>ICD-9 [ICD-10-CA] codes</b>                                                                                                                                                                                                                                                                  | <b>OHIP ICD-9 codes {or other source if in parentheses}</b> | <b>PubMed link to a related validation study of some codes</b>                                          |
|-------------------|--------------------|-------------------------------------|-------------------------------------------------------------------------------------------------------------------------------------------------------------------------------------------------------------------------------------------------------------------------------------------------|-------------------------------------------------------------|---------------------------------------------------------------------------------------------------------|
|                   | Same               | Dyslipidemia                        | 272.0-272.5 [E78]                                                                                                                                                                                                                                                                               | 272                                                         |                                                                                                         |
|                   | Same               | Drug dependence or smoking          | 291, 292, 2940, 303, 304, 305, 648.3, 6490 [F10-F19, F55]                                                                                                                                                                                                                                       | 291, 292, 303, 304, 305                                     |                                                                                                         |
|                   | Same               | Kidney disease                      | 403, 404, 58, 5937 [N17.x, O08.4, T79.5, O90.4, E10.20, E10.21, E10.23, E11.20, E11.21, E11.23, M10.39, I12, I13, I15.0, I70.1, M31.0, N01.x, N03.x, N04.x, N05.x, N06.x, N07.x, N08.x, N11.x, N12, N13.7, N13.8, N13.9, N14.x, N15.x, N16.x, N18.x, N19.x, N25.0, N25.8, N25.9, N26, R80, R94] | 403, 58                                                     | <a href="https://www.ncbi.nlm.nih.gov/pubmed/23560464">https://www.ncbi.nlm.nih.gov/pubmed/23560464</a> |
|                   | At the index birth | Preeclampsia or eclampsia           | 642.4, 642.5, 642.6, 642.7 [O11, O14, O15]                                                                                                                                                                                                                                                      |                                                             | <a href="https://www.ncbi.nlm.nih.gov/pubmed/19527567">https://www.ncbi.nlm.nih.gov/pubmed/19527567</a> |
|                   | Same               | Maternal area-level income quintile |                                                                                                                                                                                                                                                                                                 | { Statistics Canada census data}                            |                                                                                                         |

| Assessment | Timing | Disease or procedure           | ICD-9 [ICD-10-CA] codes | OHIP ICD-9 codes {or other source if in parentheses}                       | PubMed link to a related validation study of some codes |
|------------|--------|--------------------------------|-------------------------|----------------------------------------------------------------------------|---------------------------------------------------------|
|            | Same   | Maternal World region of birth |                         | {Immigration, Refugees and Citizenship Canada Permanent Resident database} |                                                         |

\*Indicates coding by Canadian Classification of Procedures (corresponding to ICD-9 years) or Canadian Classification of Interventions (corresponding to ICD-10-CA years)

ICD-9: International Classification of Diseases, 9th Revision.; ICD-10-CA: International Classification of Diseases, 10th Revision, Canada; OHIP: Ontario Health Insurance Plan.
